# Supplementary material
Source: PubMed Central journal article supplement (PMC2836659)
Supplement: 0909384107_pnas.200909384SI.pdf [file 0909384107_pnas.200909384SI.pdf]

# Supporting Information

Létourneau et al. 10.1073/pnas.0909384107

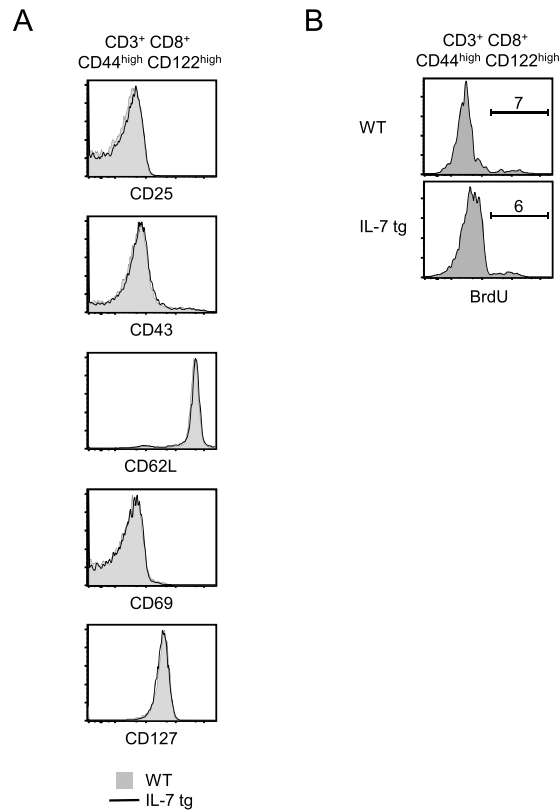

**Fig. S1.** Memory-phenotype CD8<sup>+</sup> T cells from IL-7 tg and WT mice are phenotypically and functionally indistinguishable. (A) Cell surface staining of CD25, CD43, CD62L, CD69, and CD127 on CD44<sup>high</sup> CD122<sup>high</sup> CD8<sup>+</sup> T cells from IL-7 tg (black line) and WT (filled histogram) mice. (B) To determine homeostatic proliferation of T cells, IL-7 tg or WT mice received bromodeoxyuridine (BrdU) for 3 days in the drinking water. Subsequently, incorporation of BrdU into dividing CD44<sup>high</sup> CD122<sup>high</sup> CD8<sup>+</sup> T cells in the spleen was determined by intracellular staining of BrdU, as previously published (1). The data are representative of three separate experiments.

1. Boyman O, Cho JH, Tan JT, Surh CD, Sprent J (2006) A major histocompatibility complex class I-dependent subset of memory phenotype CD8<sup>+</sup> cells. *J Exp Med* 203:1817–1825.

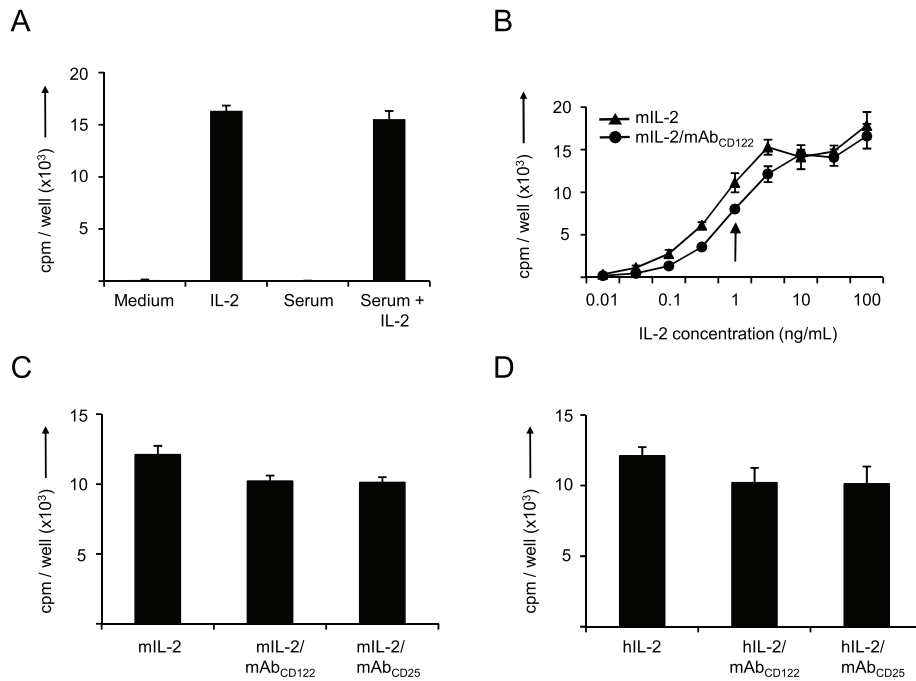

**Fig. 52.** CTLL-2 cells proliferate in response to IL-2/mAb complexes but not to WT mouse serum. (A) Proliferation of CTLL-2 cells was measured in the presence or absence of 10% serum from normal WT mice, with or without 10 ng/mL rhIL-2. (B) Titration of rIL-2 and rIL-2/mAb<sub>CD122</sub> complexes on CTLL-2 cells. The arrow points at the half-maximal IL-2 concentration (1 ng/mL) used to test IL-2/mAb complexes in C and D. (C and D) Proliferation of CTLL-2 cells in the presence of mouse (C) or human (D) IL-2/mAb complexes. Proliferation was analyzed by measuring incorporation of [<sup>3</sup>H]-thymidine. The data are representative of at least two separate experiments.

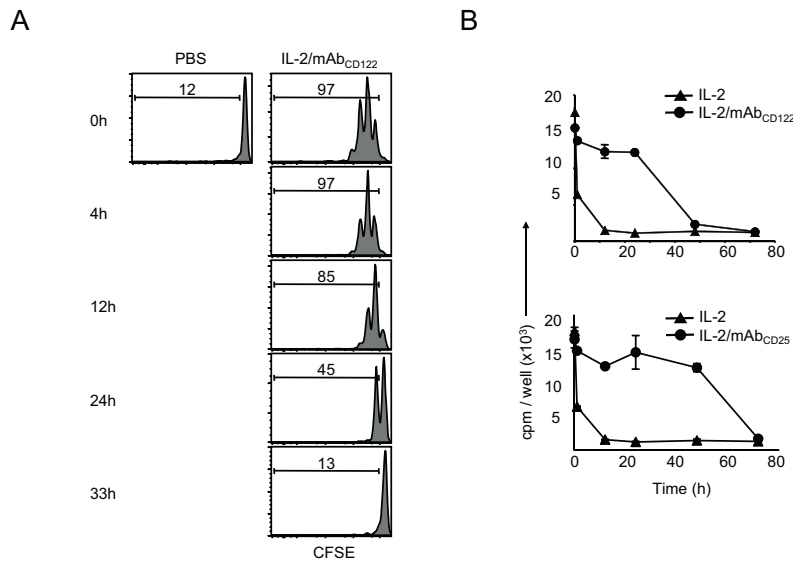

**Fig. 53.** Mouse IL-2/mAb complexes have a prolonged in vivo half-life. (A) Host WT mice received a single injection of PBS, 1.5  $\mu$ g rIL-2 or 1.5  $\mu$ g rIL-2 plus 15  $\mu$ g S4B6 anti-mIL-2 mAb<sub>CD122</sub> at the indicated time-points before adoptive transfer of CFSE-labeled Thy1.1<sup>+</sup> CD8<sup>+</sup> T cells. Host spleens were analyzed by flow cytometry 3 days after adoptive transfer. Histograms shown are gated on Thy1.1<sup>+</sup> CD8<sup>+</sup> donor cells. Numbers indicate percentage of divided cells. (B) WT mice received a single injection of rIL-2 ( $\blacktriangle$ ), rIL-2 plus S4B6 anti-mIL-2 mAb<sub>CD122</sub>, or rIL-2 plus JES6-1 anti-mIL-2 mAb<sub>CD25</sub> (both displayed as  $\bullet$ ). Blood samples were collected at the indicated time-points, and serum was assayed for proliferation of CTLL-2 cells by measuring incorporation of [<sup>3</sup>H]-thymidine. The data are representative of at least two different experiments, with each profile representing one of at least two mice.
